# Supplementary material for: Designing a binuclear copper center-incorporated photocatalyst to simulate enzyme catalysis in aerobic hydroxylation of phenylboronic acids
Source: Royal Society of Chemistry journal article supplement (doi:10.1039/d3qi01666h), 2023-01-01
Supplement: d3qi01666h1.pdf [file d3qi01666h1.pdf]

## Supporting Information

### **A Binuclear Copper Center-Incorporated Photocatalyst Applied in Mimicing Enzyme Catalysis for Aerobic Hydroxylation of Phenylboronic Acids**

Chen Si<sup>a</sup>, Xueling Liu<sup>a</sup>, Junjie Xu<sup>a</sup>, Jiangbo Xu<sup>a</sup>, Pengtao Ma<sup>a</sup>, Qiuxia Han<sup>a,\*</sup>

Henan Key Laboratory of Polyoxometalate Chemistry, College of Chemistry and Molecular Sciences, Henan University, Kaifeng, Henan 475004, P. R. China

\*Corresponding author. E-mail address: hdhqx@henu.edu.cn

### Contents

1. Supplementary Materials and Methods
2. Single-crystal X-ray Crystallography
3. Additional Structural and Characterizational Figures
4. Additional Catalysis Details
5. Supplementary References

## 1. Supplementary Materials and Methods

All solvents and reagents obtained from commercial sources were used without further purification. The Dawson-type polyoxometalate  $K_{12}[\alpha\text{-H}_2\text{P}_2\text{W}_{12}\text{O}_{48}]_{24}\cdot\text{H}_2\text{O}$  was prepared according to the literature and characterized by IR spectroscopy.<sup>s1</sup> The EA of C, H and N were recorded on a Vario EL III elemental analyzer of the Flash 2000 analyzer and Optima 2100 DV. Fourier-transform infrared (FTIR) spectra of samples were recorded in a JASCO FT/IR-430 spectrometer over a range of 4000–400  $\text{cm}^{-1}$ . The UV-vis diffuse reflectance spectra (DRS) were obtained on a HITACHI U-4100 UV-Vis/NIR spectrometer equipped with 60 mm diameter integrating sphere using finely ground sample, at room temperature. The powder X-ray diffraction (PXRD) spectra were recorded on a Rigaku Model D/Max-2400 X-ray diffractometer with a sealed copper tube ( $\lambda = 1.54178 \text{ \AA}$ ) in the angular range  $2\theta = 5\text{--}50^\circ$ . Water contents were determined by TG analyses on a Mettler-Toledo TGA/SDTA 851<sup>e</sup> instrument with a heating rate of 10  $^\circ\text{C min}^{-1}$  heated from 25 to 800  $^\circ\text{C}$  under nitrogen. Inductively Coupled Plasma (ICP) of Cu, B, and W analyses were performed on a Jarrel-AshJ-A1100 spectrometer. The photocatalytic reaction was performed on WATTCAS Parallel Light Reactor (WP-TEC-1020HSL) with 10W 6000-6500K white COB LED. Photocurrent measurements were conducted on a CHI 660E electrochemical workstation (Shanghai Chenhua Instrument Co., China) in a standard three-electrode system. The Ag/AgCl electrode and platinum foil were used as the reference electrode and counter electrode, respectively. Furthermore, the 25 mg catalyst was dispersed uniformly in 1 mL ( $\text{H}_2\text{O}/\text{Et}_2\text{OH}=1/4$ ) solution by ultrasound. The 80  $\mu\text{L}$  above solution was coated on an indium tin oxide (ITO) glass (2  $\text{cm}\times 1 \text{ cm}$ ) to dry naturally. Finally, the sample was covered with 40  $\mu\text{L}$  solution (Nafion:  $\text{Et}_2\text{OH} = 1:3$ ). In the frequency range from 0.1 to 100 000 Hz, the electrochemical impedance spectra (EIS) data were collected. The visible light source was a 300 W Xe lamp. The yields were tested on a gas chromatograph (Agilent 8860G2790A). The photoluminescence (PL) properties were obtained on a EDINBURGH FLS 980 fluorescence spectrophotometer equipped, which have a 450 W xenon lamp.

## 2. Single-crystal X-ray Crystallography

A good single crystal of **Cu(I)W–TPT** with dimensions of 0.1 × 0.08 × 0.12 mm<sup>3</sup> was prudentially picked under an optical microscope and sealed to a glass tube closed at both ends. A suitable crystal was selected and on a Bruker D8 VENTURE PHOTON II diffractometer with graphite-monochromated Mo K $\alpha$  ( $\lambda$  = 0.71073 Å) at 284(2) K using SAINT and SMART programs. The crystal was kept at 168.08 K during data collection. Using Olex2<sup>s2</sup>, the structure was solved with the olex2.solve<sup>s3</sup> structure solution program using Charge Flipping and refined with the ShelXL<sup>s4</sup> refinement package using Least Squares minimisation. All the atoms were refined anisotropically in the last refinement cycle. H atoms were fixed in calculated positions and then refined using a riding model. All of them are directly included in the molecular formula. The CCDC number of **Cu(I)W–TPT** is 2280692. Crystallographic data and structure refinements for **Cu(I)W–TPT** are listed in Table S1.

**Table S1.** Crystal data and structure refinement for **Cu(I)W–TPT**.

| Crystal data                                   | Cu(I)W–TPT                                                                                                                         |
|------------------------------------------------|------------------------------------------------------------------------------------------------------------------------------------|
| empirical formula                              | C <sub>54</sub> H <sub>36</sub> Cl <sub>0.5</sub> Cu <sub>2</sub> N <sub>18</sub> O <sub>69.5</sub> P <sub>2</sub> W <sub>18</sub> |
| crystal system                                 | triclinic                                                                                                                          |
| space group                                    | P-1                                                                                                                                |
| <i>a</i> (Å)                                   | 14.1811(16)                                                                                                                        |
| <i>b</i> (Å)                                   | 17.970(3)                                                                                                                          |
| <i>c</i> (Å)                                   | 20.978(2)                                                                                                                          |
| $\alpha$ (deg)                                 | 91.429(6)                                                                                                                          |
| $\beta$ (deg)                                  | 92.792(3)                                                                                                                          |
| $\gamma$ (deg)                                 | 99.305(6)                                                                                                                          |
| <i>V</i> (Å <sup>3</sup> )                     | 5266.5(12)                                                                                                                         |
| <i>Z</i>                                       | 2                                                                                                                                  |
| <i>T</i> , K                                   | 168.08                                                                                                                             |
| $\mu$ / mm <sup>-1</sup>                       | 20.111                                                                                                                             |
| F(000)                                         | 4941.0                                                                                                                             |
| 2 $\theta$ (deg)                               | 4.34 - 50.2                                                                                                                        |
| Index ranges                                   | -16 ≤ <i>h</i> ≤ 16, -21 ≤ <i>k</i> ≤ 21,<br>-24 ≤ <i>l</i> ≤ 25                                                                   |
| Reflections collected / unique                 | 66019 / 18720 [Rint =<br>0.0410, Rsigma = 0.0409]                                                                                  |
| Data / restraints / parameters                 | 18720 / 6 / 1465                                                                                                                   |
| GOF                                            | 1.024                                                                                                                              |
| $R_1^a$ [ <i>I</i> > 2 <i>s</i> ( <i>I</i> )]  | 0.0344                                                                                                                             |
| $wR_2^b$ [ <i>I</i> > 2 <i>s</i> ( <i>I</i> )] | 0.0818                                                                                                                             |
| $R_1^a$ (all data)                             | 0.0442                                                                                                                             |
| $wR_2^b$ (all data)                            | 0.0863                                                                                                                             |
| diff peak and hole, eÅ <sup>-3</sup>           | 2.04 / -2.53                                                                                                                       |

<sup>[a]</sup>  $R_1 = \sum ||F_o| - |F_c|| / \sum |F_o|$ , <sup>[b]</sup>  $wR_2 = [\sum w(F_o^2 - F_c^2)^2 / \sum w(F_o^2)]^{1/2}$ ;  $w = 1 / [\sigma^2(F_o^2) + (xP)^2 + yP]$ ,  $P = (F_o^2 + 2F_c^2) / 3$ , where  $x = 0.0315$ ,  $y = 65.1509$  for **Cu(I)W–TPT**.

**Table S2.** The selected bond lengths and angles of **Cu(I)W–TPT**.

| <b>Bond</b> | <b>Length</b> | <b>Bond</b>              | <b>Length</b> |
|-------------|---------------|--------------------------|---------------|
| W(1)–O(5)   | 1.865(7)      | W(14)–O(30)              | 1.903(8)      |
| W(1)–O(9)   | 1.854(7)      | W(15)–O(10)              | 1.902(8)      |
| W(2)–O(6)   | 1.909(7)      | W(15)–O(17)              | 1.920(7)      |
| W(2)–O(19)  | 2.366(7)      | W(16)–O(4)               | 2.340(7)      |
| W(3)–O(27)  | 1.956(7)      | W(16)–O(11)              | 1.927(7)      |
| W(3)–O(35)  | 1.877(7)      | W(17)–O(1)               | 2.442(7)      |
| W(4)–O(13)  | 1.880(7)      | W(17)–O(7)               | 1.910(7)      |
| W(4)–O(12)  | 1.958(7)      | W(18)–O(2)               | 2.378(7)      |
| W(5)–O(2)   | 2.329(6)      | W(18)–O(13)              | 1.941(7)      |
| W(5)–O(9)   | 1.999(7)      | P(00L)–O(2)              | 1.526(7)      |
| W(6)–O(1)   | 2.257(6)      | P(00L)–O(4)              | 1.528(7)      |
| W(6)–O(7)   | 1.893(7)      | P(00L)–O(19)             | 1.532(7)      |
| W(7)–O(30)  | 1.934(8)      | P(00L)–O(43)             | 1.579(7)      |
| W(7)–O(31)  | 1.871(7)      | P(00M)–O(1)              | 1.540(7)      |
| W(8)–O(3)   | 2.373(7)      | P(00M)–O(3)              | 1.534(7)      |
| W(8)–O(6)   | 1.896(7)      | P(00M)–O(37)             | 1.529(7)      |
| W(9)–O(4)   | 2.398(7)      | P(00M)–O(61)             | 1.581(7)      |
| W(9)–O(5)   | 2.008(7)      | Cu(1)–N(3)               | 2.016(9)      |
| W(10)–O(3)  | 2.339(7)      | Cu(1)–N(7)               | 2.021(9)      |
| W(10)–O(8)  | 1.894(7)      | Cu(1)–O(44)              | 1.959(7)      |
| W(11)–O(23) | 1.870(7)      | Cu(1)–O(2W)              | 1.969(8)      |
| W(11)–O(34) | 1.931(8)      | Cu(1)–O(1W)              | 2.383(9)      |
| W(12)–O(12) | 1.902(7)      | Cu(2)–N(9)               | 2.004(8)      |
| W(12)–O(17) | 1.906(7)      | Cu(2)–N(13)              | 2.012(9)      |
| W(13)–O(8)  | 1.881(7)      | Cu(2)–O(48) <sup>†</sup> | 2.348(7)      |
| W(13)–O(19) | 2.393(6)      | Cu(2)–O(3W)              | 2.024(8)      |
| W(14)–O(22) | 1.909(7)      | Cu(2)–O(4W)              | 1.9316(13)    |

  

| <b>Bond</b>      | <b>Angle</b> | <b>Bond</b>        | <b>Angle</b> |
|------------------|--------------|--------------------|--------------|
| O(5)–W(1)–O(14)  | 88.3(3)      | O(13)–W(18)–O(2)   | 84.4(3)      |
| O(5)–W(1)–O(36)  | 158.9(3)     | O(13)–W(18)–O(27)  | 166.6(3)     |
| O(6)–W(2)–O(19)  | 83.2(3)      | O(2)–P(00L)–O(4)   | 111.4(4)     |
| O(6)–W(2)–O(29)  | 89.6(3)      | O(2)–P(00L)–O(19)  | 111.0(4)     |
| O(14)–W(3)–O(43) | 72.8(3)      | O(2)–P(00L)–O(43)  | 107.0(4)     |
| O(28)–W(3)–O(14) | 157.7(3)     | O(4)–P(00L)–O(19)  | 112.4(4)     |
| O(13)–W(4)–O(32) | 157.2(3)     | O(4)–P(00L)–O(43)  | 107.9(4)     |
| O(13)–W(4)–O(36) | 88.9(3)      | O(19)–P(00L)–O(43) | 106.9(4)     |
| O(9)–W(5)–O(2)   | 80.8(3)      | O(1)–P(00M)–O(61)  | 107.1(4)     |
| O(15)–W(5)–O(2)  | 74.0(3)      | O(3)–P(00M)–O(0)   | 111.4(4)     |
| O(7)–W(6)–O(1)   | 75.4(3)      | O(3)–P(00M)–O(61)  | 107.6(4)     |

---

|                   |          |                                |           |
|-------------------|----------|--------------------------------|-----------|
| O(7)-W(6)-O(20)   | 161.5(3) | O(37)-P(00M)-O(1)              | 111.3(4)  |
| O(30)-W(7)-O(40)  | 86.1(3)  | O(37)-P(00M)-O(3)              | 111.7(4)  |
| O(30)-W(7)-O(61)  | 72.3(3)  | O(37)-P(00M)-O(61)             | 107.4(4)  |
| O(6)-W(8)-O(3)    | 84.4(3)  | N(3)-Cu(1)-N(7)                | 157.9(4)  |
| O(6)-W(8)-O(16)   | 90.9(3)  | N(3)-Cu(1)-O(1W)               | 97.1(4)   |
| O(5)-W(9)-O(4)    | 80.7(3)  | N(7)-Cu(1)-O(1W)               | 103.9(4)  |
| O(11)-W(9)-O(4)   | 72.9(3)  | O(44)-Cu(1)-N(3)               | 89.6(3)   |
| O(8)-W(10)-O(3)   | 82.8(3)  | O(44)-Cu(1)-N(7)               | 86.8(3)   |
| O(8)-W(10)-O(16)  | 89.4(3)  | O(44)-Cu(1)-O(2W)              | 169.1(3)  |
| O(23)-W(11)-O(34) | 89.9(3)  | O(44)-Cu(1)-O(1W)              | 81.4(3)   |
| O(23)-W(11)-O(40) | 156.2(3) | O(2W)-Cu(1)-N(3)               | 93.6(4)   |
| O(12)-W(12)-O(17) | 158.3(3) | O(2W)-Cu(1)-N(7)               | 94.0(4)   |
| O(12)-W(12)-O(24) | 88.0(3)  | O(2W)-Cu(1)-O(1W)              | 87.8(3)   |
| O(8)-W(13)-O(19)  | 82.8(3)  | N(9)-Cu(2)-N(13)               | 170.1(4)  |
| O(8)-W(13)-O(26)  | 90.0(3)  | N(9)-Cu(2)-O(48) <sup>1</sup>  | 97.3(3)   |
| O(22)-W(14)-O(34) | 157.8(3) | N(9)-Cu(2)-O(3W)               | 89.1(3)   |
| O(22)-W(14)-O(39) | 85.3(3)  | N(13)-Cu(2)-O(48) <sup>1</sup> | 92.5(3)   |
| O(10)-W(15)-O(17) | 157.0(3) | N(13)-Cu(2)-O(3W)              | 93.3(3)   |
| O(10)-W(15)-O(23) | 84.9(3)  | O(3W)-Cu(2)-O(48) <sup>1</sup> | 83.3(3)   |
| O(11)-W(16)-O(4)  | 74.1(3)  | O(4W)-Cu(2)-N(9)               | 87.5(3)   |
| O(11)-W(16)-O(38) | 88.9(3)  | O(4W)-Cu(2)-N(13)              | 90.5(3)   |
| O(7)-W(17)-O(1)   | 70.7(3)  | O(4W)-Cu(2)-O(48) <sup>1</sup> | 94.29(19) |
| O(7)-W(17)-O(22)  | 90.4(3)  | O(4W)-Cu(2)-O(3W)              | 175.6(2)  |

---

### 3. Additional Structural and Characterizational Figures.

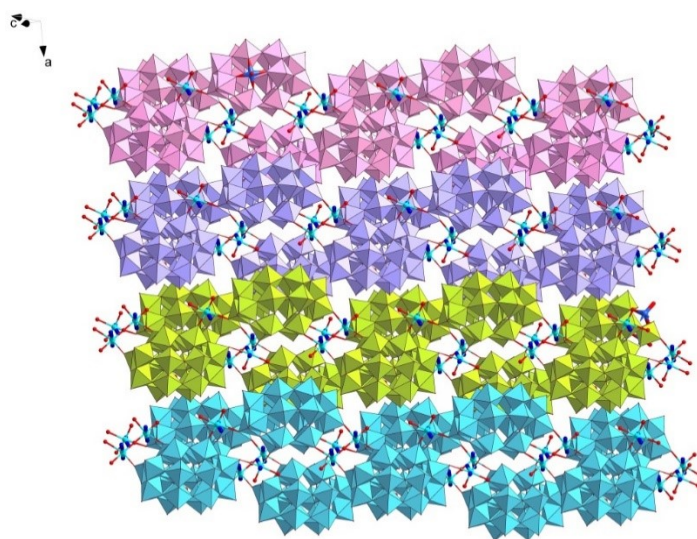

**Figure S1.** 3D open network of the **Cu(I)W-TPT**.

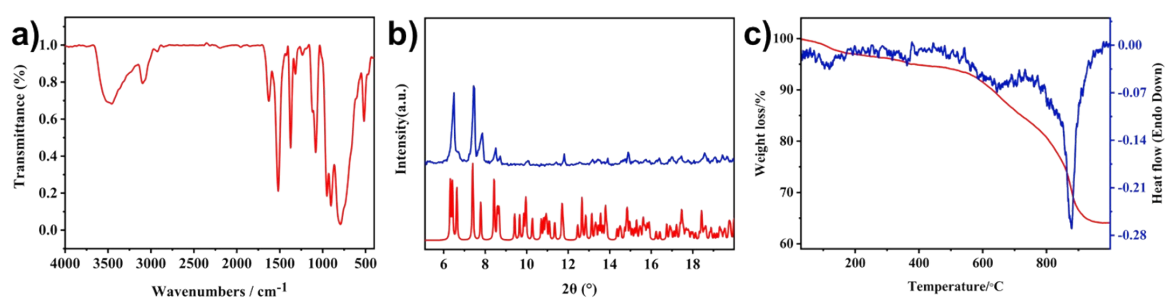

**Figure S2.** (a) IR spectra; (b) PXRD patterns (bottom, simulated; top, experimental); (c) TG-DTA of **Cu(I)W-TPT**.

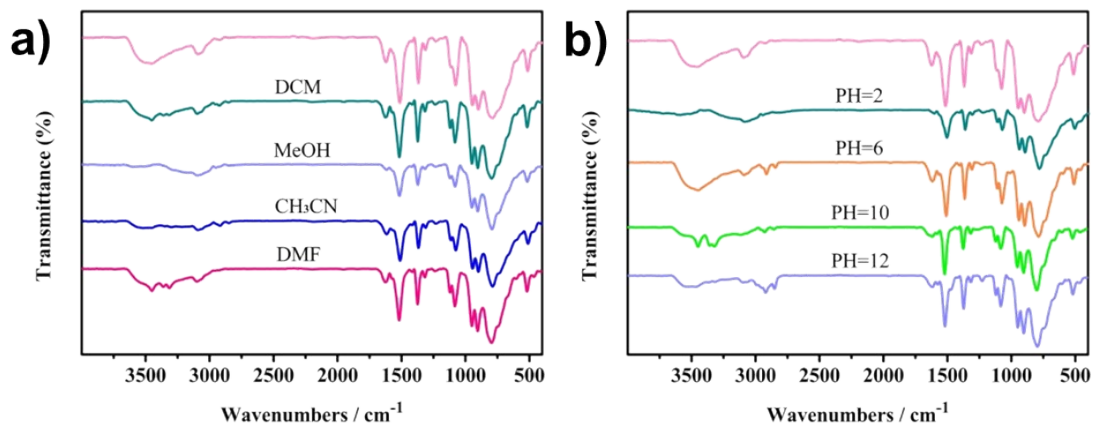

**Figure S3.** (a) IR spectra of **Cu(I)W-TPT** in different organic solvents. (b) IR spectra of **Cu(I)W-TPT** in different aqueous with different pH values. The pH values were adjusted with  $0.5 \text{ mol}\cdot\text{L}^{-1}$  HCl (pH=2) and NaOH solutions (pH=10,12), respectively.

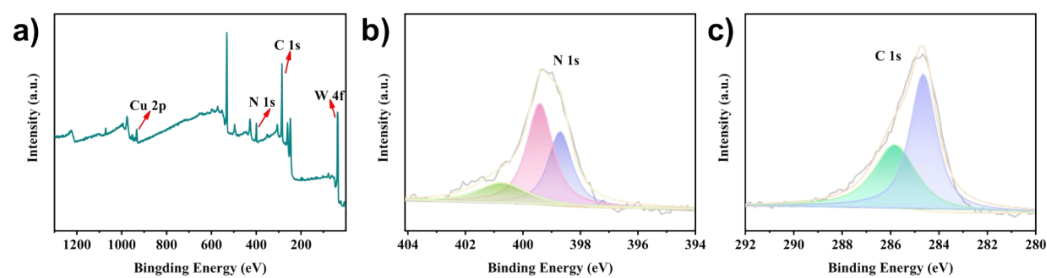

**Figure S4.** (a) XPS survey spectra of **Cu(I)W-TPT**; (b, c)The high-resolution XPS spectra of N 1s and C 1s.



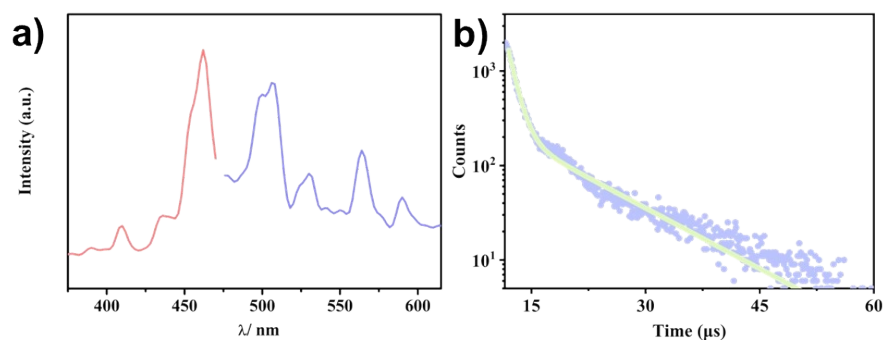

**Figure S5.** (a, b) Excitation and emission spectra and Luminescence lifetime curve of **Cu(I)W-TPT**.

#### 4. Additional Catalysis Details

The photocatalytic reaction was performed on WATTCAS Parallel Light Reactor with continuous cooling water equipment (WP-TEC-1020HSL). In a typical reaction system, phenylboronic acid (0.5 mmol), catalyst **Cu(I)W-TPT** (10 mg),  $\text{Et}_3\text{N}$  (0.6 mmol), and acetonitrile (2 mL) were added to a quartz tube (15 mL) equipped with a stir bar. A 10 W 6000-6500 K white COB LED was used as the light source by bottom irradiation. The temperature of the reaction was in the range of  $25 \pm 5$  °C. After 24 h of reaction, the mixture was centrifuged to remove **Cu(I)W-TPT** samples. Then, the mixture was extracted with ethyl acetate, dried with anhydrous  $\text{Na}_2\text{SO}_4$ . The product was obtained by rotary evaporation at 40 °C. The conversion and selectivity were determined by  $^1\text{H}$  NMR.

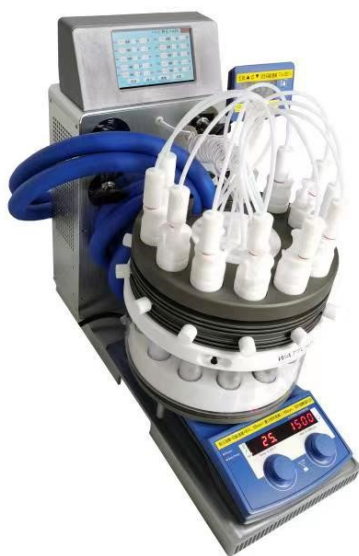

**Figure S6.** Sketch portrays the reaction setup.

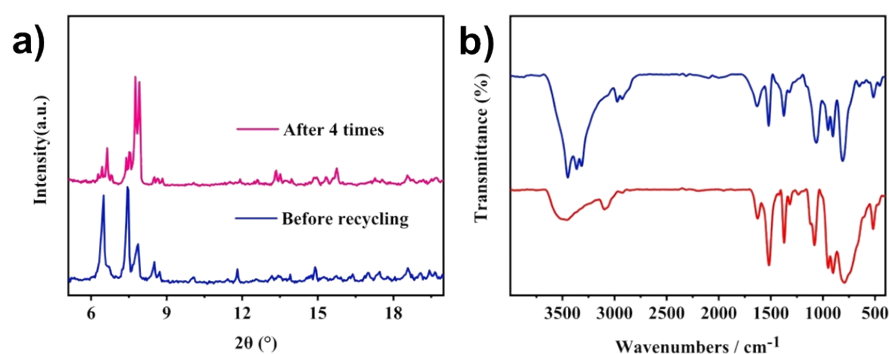

Figure S7. (a, b) FT-IR spectra and PXRD patterns after four recycles of Cu(I)W-TPT.

**Table S3.** Summary of the activity of photocatalytic oxidation of Phenylboronic acid

| Catalyst                              | T(°C)      | Light source           | Oxidant        | Additives              | t (h)     | Yield (%) | Ref. |
|---------------------------------------|------------|------------------------|----------------|------------------------|-----------|-----------|------|
| LZU-190-COF                           | r.t        | 20 W white LEDs        | air            | iPr <sub>2</sub> NEt   | 48        | 99        | S4   |
| Zr-TCPCo                              | r.t        | 450 nm LED irradiation | O <sub>2</sub> | Et <sub>3</sub> N      | 24        | 91        | S5   |
| CCN-P                                 | r.t        | blue LED lamp          | O <sub>2</sub> | Et <sub>3</sub> N      | 4         | 99        | S6   |
| EFC-CMP                               | r.t        | blue LEDs              | air            | DIPEA                  | 1.3       | 91        | S7   |
| UiO-67-Ru(bpy) <sub>3</sub> -MOF      | r.t        | UV-365                 | air            | iPr <sub>2</sub> NEt   | 48        | 81        | S8   |
| N-C/In <sub>2</sub> O <sub>3</sub> HD | r.t        | blue LEDs              | air            | DIPEA                  | 24        | 99        | S9   |
| Cz-POF-1                              | r.t        | Fluorescence lamp      | air            | Et <sub>3</sub> N      | 24        | 94        | S10  |
| CPOP-29                               | r.t        | white LEDs             | air            | iPr <sub>2</sub> NEt   | 48        | 98        | S11  |
| <b>This work</b>                      | <b>r.t</b> | <b>10 W white LEDs</b> | <b>air</b>     | <b>Et<sub>3</sub>N</b> | <b>24</b> | <b>99</b> |      |

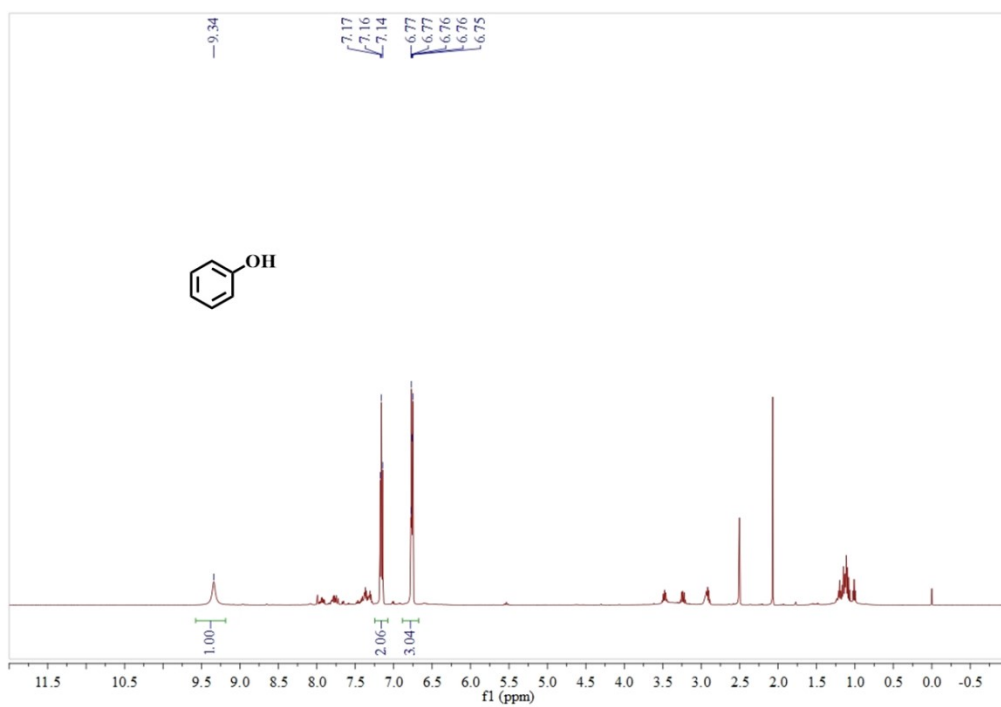

**Figure S8.**  $^1\text{H}$  NMR spectrum of phenyl hydroxide

$^1\text{H}$  NMR (500 MHz, DMSO)  $\delta$  9.34 (s, 1H), 7.16 (t,  $J = 7.9$  Hz, 2H), 6.89 – 6.67 (m, 3H).

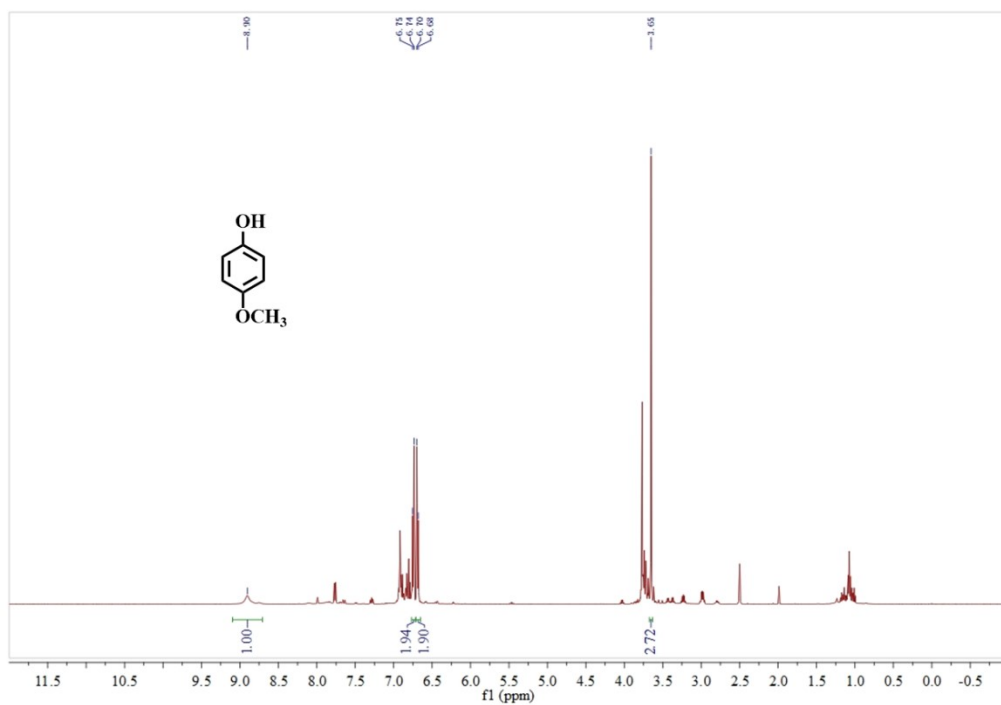

**Figure S9.**  $^1\text{H}$  NMR spectrum of 4-Methoxyphenol

$^1\text{H}$  NMR (500 MHz, DMSO)  $\delta$  8.90 (s, 1H), 6.75 (d,  $J = 9.0$  Hz, 2H), 6.69 (d,  $J = 9.0$  Hz, 2H), 3.65 (s, 3H).

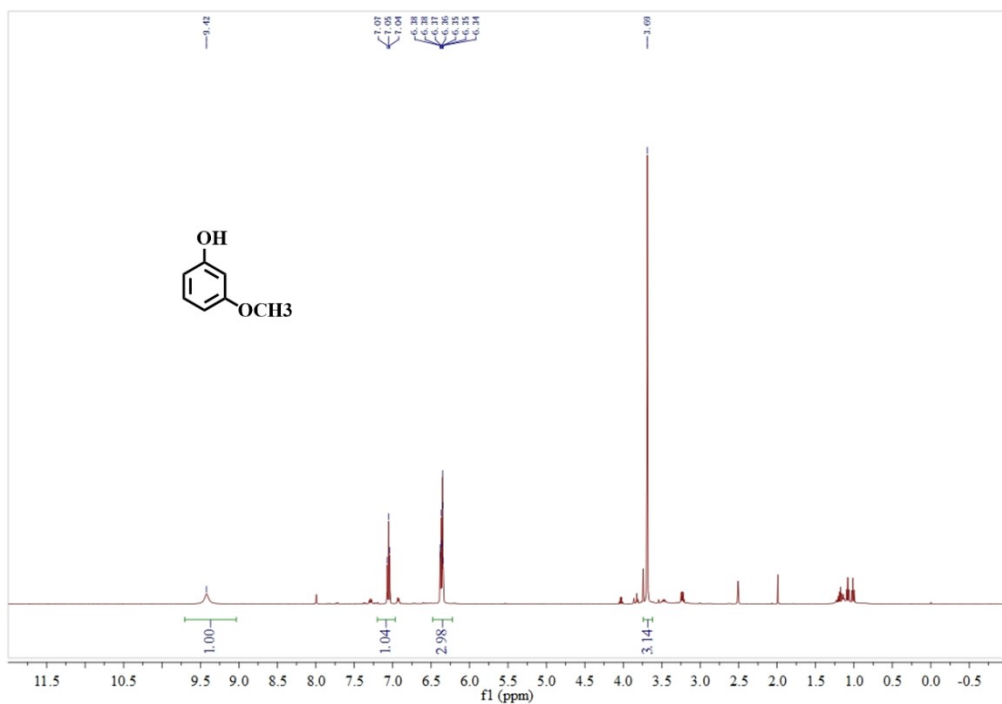

**Figure S10.**  $^1\text{H}$  NMR spectrum of m-Methoxyphenol

$^1\text{H}$  NMR (500 MHz, DMSO)  $\delta$  9.42 (s, 1H), 7.05 (t,  $J = 8.1$  Hz, 1H), 6.48 – 6.23 (m, 3H), 3.69 (s, 3H).

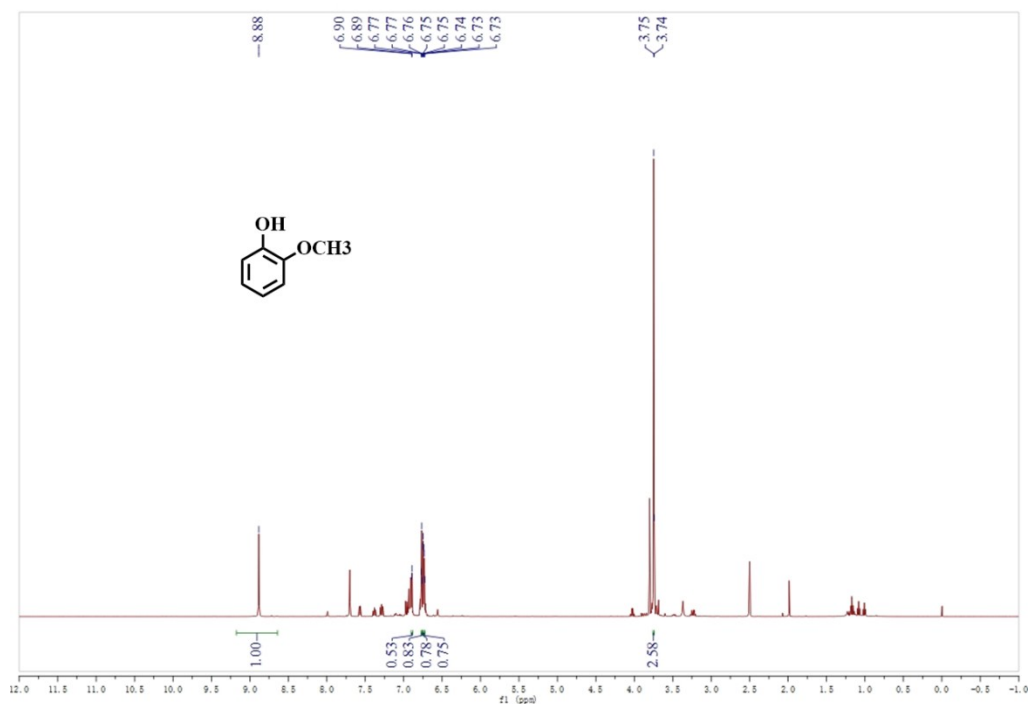

**Figure S11.**  $^1\text{H}$  NMR spectrum of 2-methoxy-Phenol

$^1\text{H}$  NMR (500 MHz, DMSO)  $\delta$  8.88 (s, 1H), 6.89 (d,  $J = 2.6$  Hz, 1H), 6.77 (t,  $J = 2.1$  Hz, 1H), 6.75 (d,  $J = 2.5$  Hz, 1H), 6.74 – 6.72 (m, 1H), 3.75 (s, 3H).

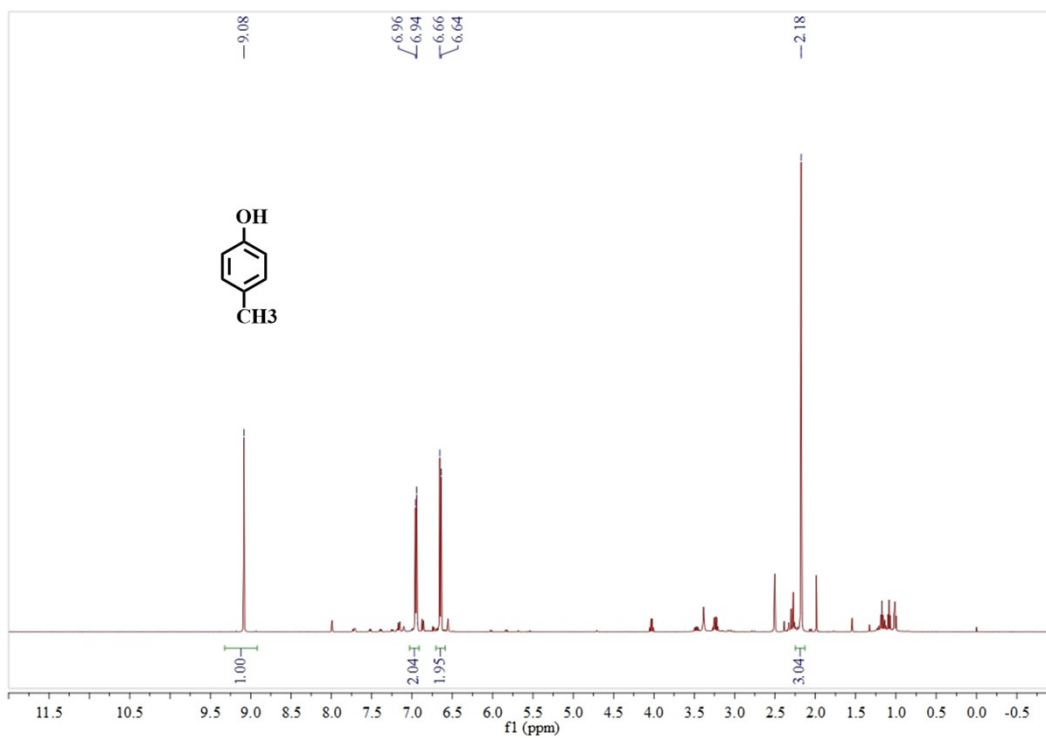

**Figure S12.**  $^1\text{H}$  NMR spectrum of p-Cresol

$^1\text{H}$  NMR (500 MHz, DMSO)  $\delta$  9.08 (s, 1H), 6.95 (d,  $J$  = 8.3 Hz, 2H), 6.65 (d,  $J$  = 8.4 Hz, 2H), 2.18 (s, 3H).

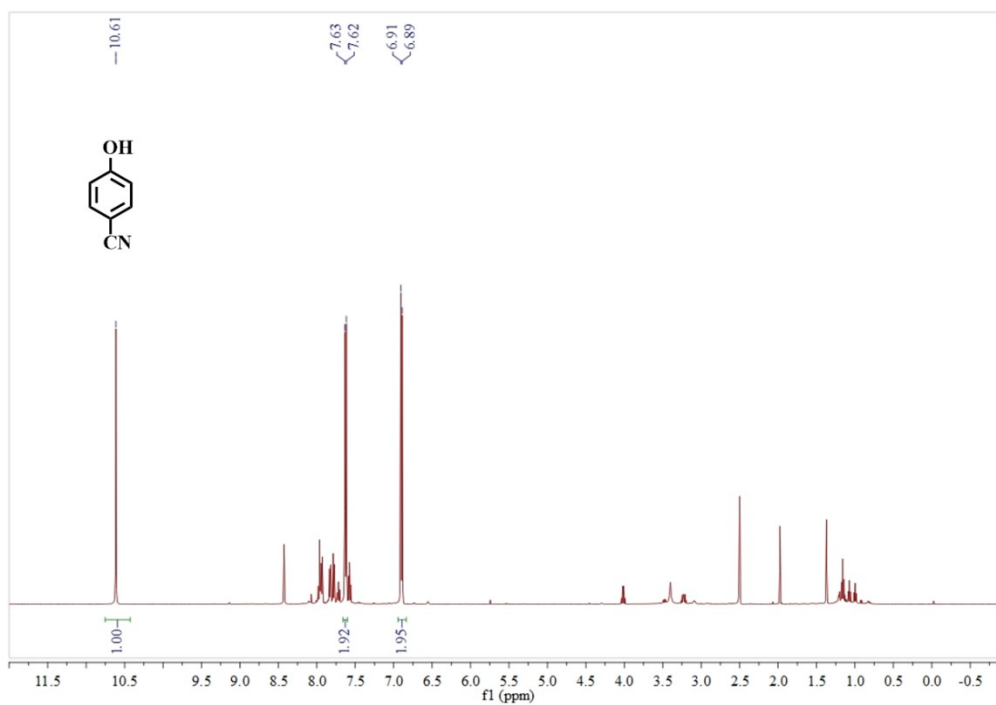

**Figure S13.**  $^1\text{H}$  NMR spectrum of 4-Cyanophenol

$^1\text{H}$  NMR (500 MHz, DMSO)  $\delta$  10.61 (s, 1H), 7.63 (d,  $J$  = 8.7 Hz, 2H), 6.90 (d,  $J$  = 8.8 Hz, 2H).

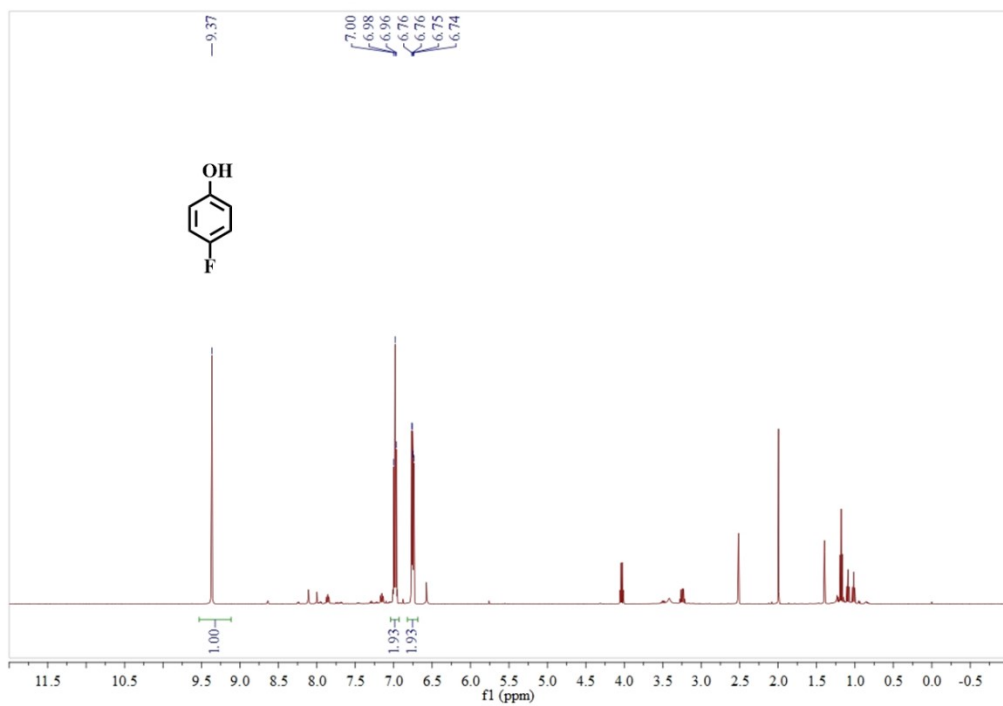

**Figure S14.**  $^1\text{H}$  NMR spectrum of 4-Fluorophenol  
 $^1\text{H}$  NMR (500 MHz, DMSO)  $\delta$  9.37 (s, 1H), 6.98 (t,  $J$  = 8.9 Hz, 2H), 6.75 (dd,  $J$  = 9.0, 4.5 Hz, 2H).

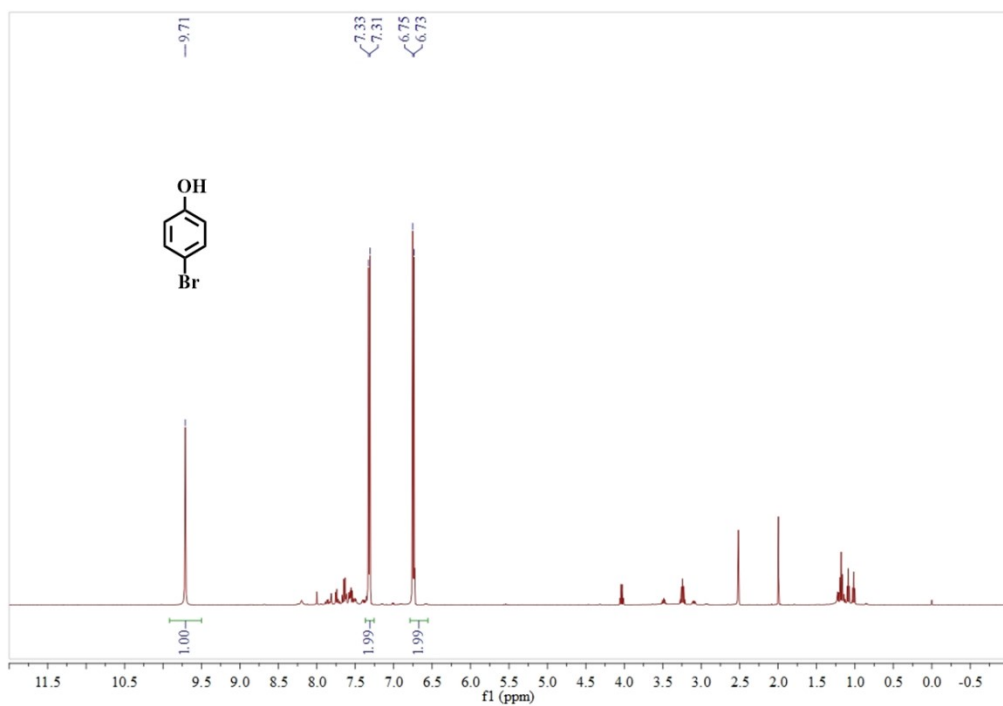

**Figure S15.**  $^1\text{H}$  NMR spectrum of 4-Bromophenol  
 $^1\text{H}$  NMR (500 MHz, DMSO)  $\delta$  9.71 (s, 1H), 7.32 (d,  $J$  = 8.8 Hz, 2H), 6.74 (d,  $J$  = 8.9 Hz, 2H).

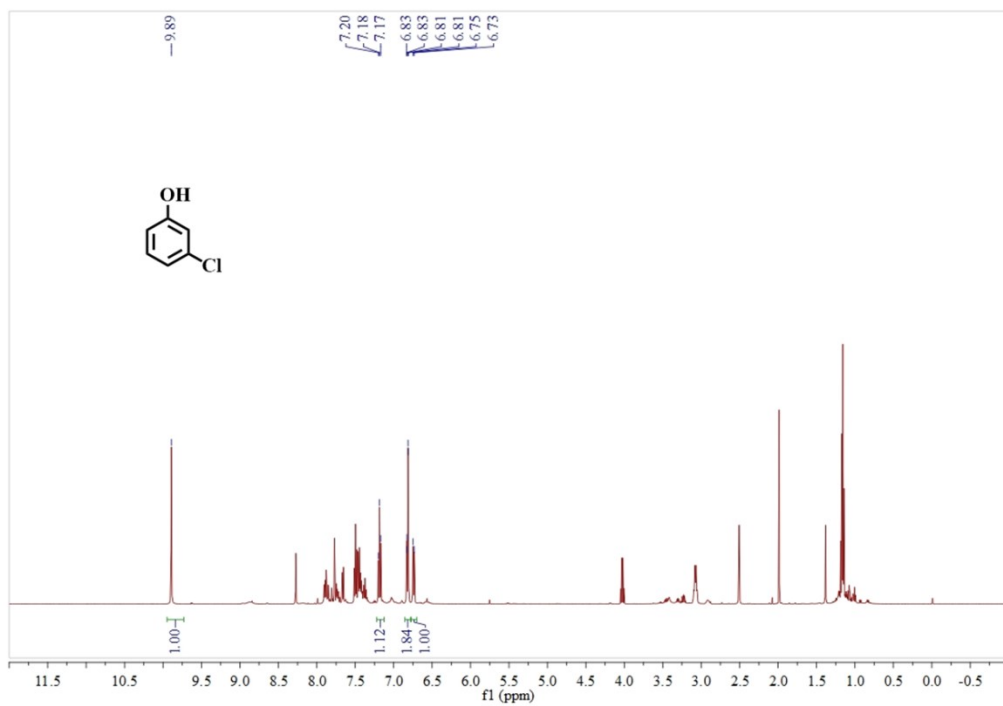

**Figure S16.**  $^1\text{H}$  NMR spectrum of 3-Chlorophenol

$^1\text{H}$  NMR (500 MHz, DMSO)  $\delta$  9.89 (s, 1H), 7.18 (t,  $J$  = 8.1 Hz, 1H), 6.82 (dd,  $J$  = 8.3, 1.6 Hz, 2H), 6.74 (d,  $J$  = 9.4 Hz, 1H).

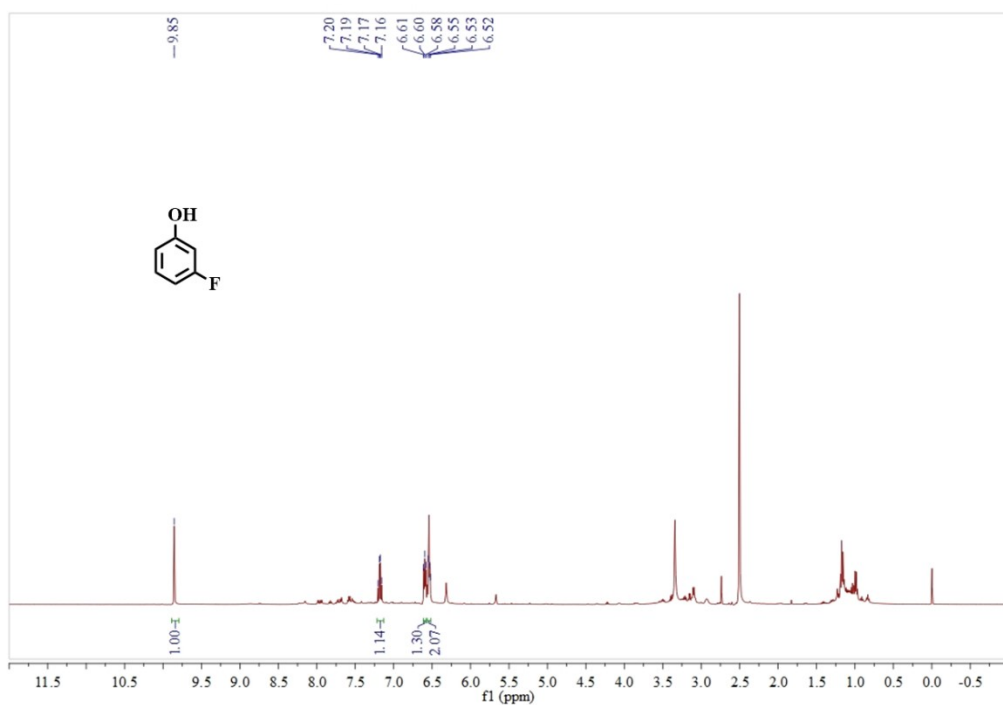

**Figure S17.**  $^1\text{H}$  NMR spectrum of 3-Fluorophenol

$^1\text{H}$  NMR (500 MHz, DMSO)  $\delta$  9.85 (s, 1H), 7.18 (dd,  $J$  = 15.6, 8.0 Hz, 1H), 6.60 (s, 1H), 6.56 – 6.52 (m, 2H).

## 5. Supplementary References

S1 B. Godin, J. Vaissermann, P. Herson, L. Ruhlmann, M. Verdaguer, P. Gouzerh, Coordination chemistry of the hexavacant tungstophosphate  $[H_2P_2W_{12}O_{48}]^{12-}$ : synthesis and characterization of iron(III) complexes derived from the unprecedented  $\{P_2W_{14}O_{54}\}$  fragment, *Chem. Commun.*, 2005, 5624.

S2 Dolomanov, O.V., Bourhis, L.J., Gildea, R.J., Howard, J.A.K. & Puschmann, OLEX2: a complete structure solution, refinement and analysis program, H. (2009), *J. Appl. Cryst.* 42, 339-341.

S3 Bourhis, L.J., Dolomanov, O.V., Gildea, R.J., Howard, J.A.K., Puschmann, The anatomy of a comprehensive constrained, restrained refinement program for the modern computing environment – Olex2 dissected, H. (2015). *Acta Cryst.* A71, 59-75.

S4 Sheldrick, G.M. (2015). SHELXT-Integrated space-group and crystal-structure determination, *Acta Cryst.* C71, 3-8.

S4 P. F. Wei, M. Z. Qi, Z. P. Wang, S. Y. Ding, W. Yu, Q. Liu, L. K. Wang, H. Z. Wang, W. K. An, W. Wang, Benzoxazole-Linked Ultrastable Covalent Organic Frameworks for Photocatalysis, *J. Am. Chem. Soc.*, 2018, 140, 4623–4631.

S5 Martin, C. R.; Park, K. C.; Leith, G. A.; Yu, J.; Mathur, A.; Wilson, G. R.; Gange, G. B.; Barth, E. L.; Ly, R. T.; Manley, O. M.; Forrester, K. L.; Karakalos, S. G.; Smith, M. D.; Makris, T. M.; Vannucci, A. K.; Peryshkov, D. V.; Shustova, N. B. Stimuli-Modulated Metal Oxidation States in Photochromic MOFs. *J. Am. Chem. Soc.*, 2022, **144**, 4457–4468.

S5 Y. Xiao, C. M. Zhu, R. B. Liang, Y. L. Huang, C. H. Hai, J. R. Chen, M. Li, J. J. Zhong, X. C. Huang, Building a cobaloxime-based metal–organic framework for photocatalytic aerobic oxidation of arylboronic acids to phenols, *Chem. Commun.* 2023, **59**, 2239–2242.

S6 W. Ren, J. Cheng, H. Ou, C. Huang, M. Anpo, X. Wang, Optimizing the crystallization process of conjugated polymer photocatalysts to promote electron transfer and molecular oxygen activation, *J. Catal.*, 2020, **389**, 636–645.

S7 X. Dong, H. Hao, F. Zhang, X. Lang, Blue light photocatalysis of carbazole-based conjugated microporous polymers: Aerobic hydroxylation of phenylboronic acids to phenols, *Applied Catalysis B: Environmental.*, 2022, **309**, 121210.

S8 X. Yu, S.M. Cohen, Photocatalytic metal–organic frameworks for the aerobic oxidation of arylboronic acids, *Chem. Commun.*, 2015, **51**, 9880–9883.



S9 L. Sun, R. Li, W. Zhan, F. Wang, Y. Zhuang, X. Wang, X. Han, Rationally Designed Double-Shell Dodecahedral Microreactors with Efficient Photoelectron Transfer: N-Doped-C-Encapsulated Ultrafine In<sub>2</sub>O<sub>3</sub> Nanoparticles, *Chem. Eur. J.* 25 (2019) 3053–3060.

S10 J. Luo, X. Zhang, J. Zhang, Carbazolic Porous Organic Framework as an Efficient, Metal-Free Visible-Light Photocatalyst for Organic Synthesis, *ACS Catal.* 5 (2015) 2250–2254.

S11 H. P. Liang, Q. Chen, B. H. Han, Cationic Polycarbazole Networks as Visible-Light Heterogeneous Photocatalysts for Oxidative Organic Transformations, *ACS Catal.* 8 (2018) 5313–5322.
